# Supplementary material for: Integrating ultraviolet sensing and memory functions in gallium nitride-based optoelectronic devices
Source: Royal Society of Chemistry journal article supplement (doi:10.1039/d3nh00560g), 2024-01-01
Supplement: d3nh00560g1.pdf [file d3nh00560g1.pdf]

## Supplementary Information

### Integrating Ultraviolet Sensing and Memory Functions in Gallium Nitride-based Optoelectronic Devices

*Kuan-Chang Chang<sup>1</sup>, Xibei Feng<sup>1</sup>, Xinqing Duan<sup>1</sup>, Huangbai Liu<sup>1</sup>, Yanxin Liu<sup>1</sup>, Zehui Peng<sup>1</sup>, Xinnan Lin<sup>2,\*</sup>, Lei Li<sup>1,\*</sup>.*

*<sup>1</sup> School of Electronic and Computer Engineering, Peking University Shenzhen Graduate School, Shenzhen 518055, China*

*<sup>2</sup> Anhui Engineering Research Center of Vehicle Display Integrated Systems, School of Integrated Circuits, Anhui Polytechnic University, Wuhu 241000, China*

**Corresponding authors. E-mail address:** [lilei@pkusz.edu.cn](mailto:lilei@pkusz.edu.cn) (Lei Li)  
[xnlin@mail.ahpu.edu.cn](mailto:xnlin@mail.ahpu.edu.cn) (Xinnan Lin)

### Supplementary Information 1

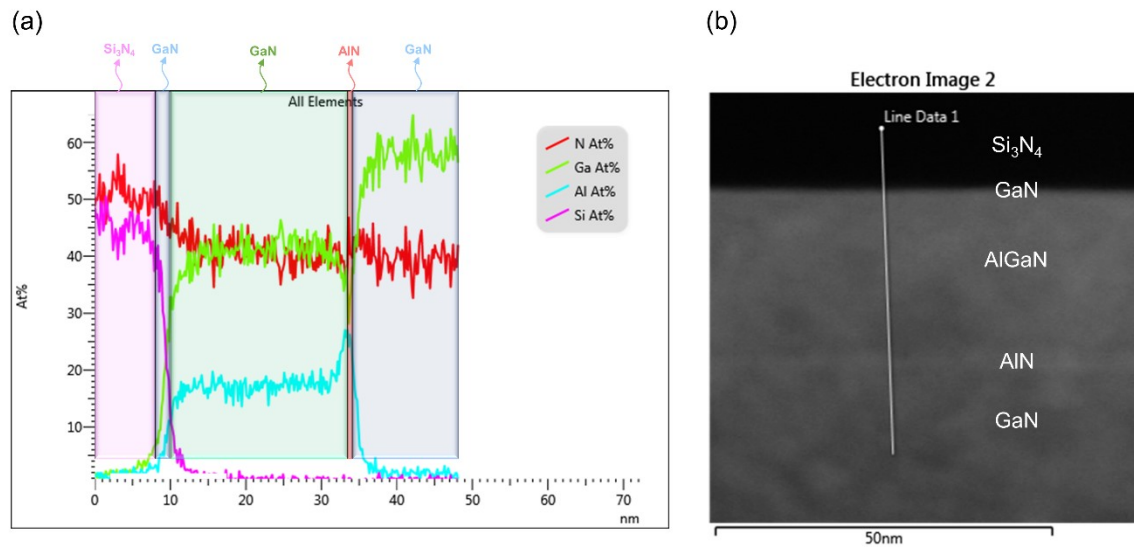

**Figure S1.** (a) EDS results of Si, Al, Ga, N elements in the memory device. (b) The EDS image shows the cross-section multi-layer structure in gate region.

## Supplementary Information 2

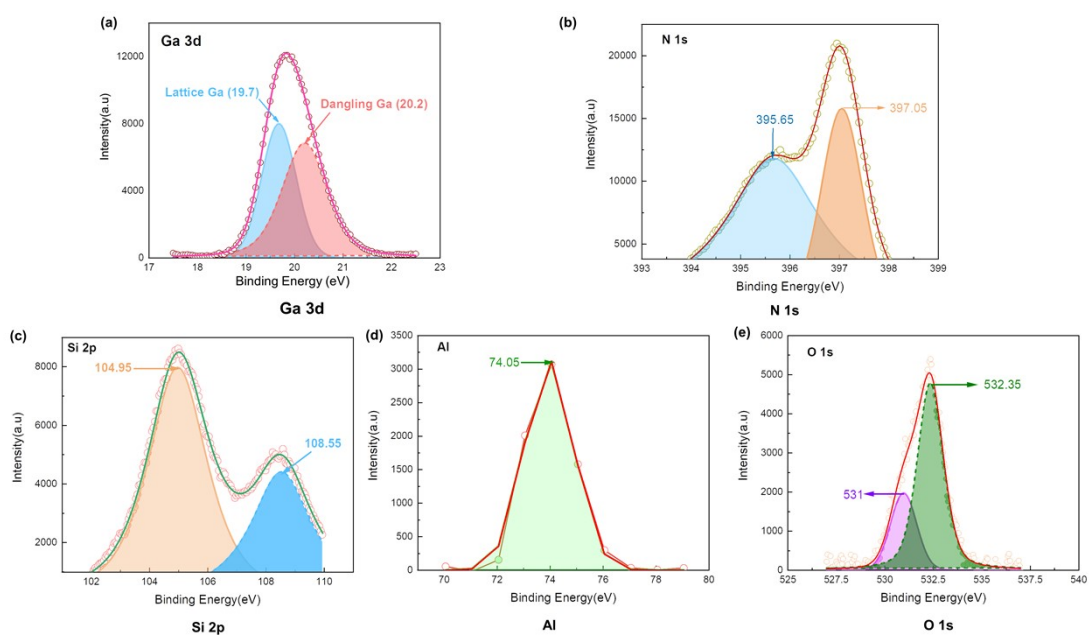

**Figure S2.** X-ray photoelectron spectroscopy (XPS) spectra of GaN optoelectronic memory. (a) Ga 3d regions. (b) N 1s regions. (c) Si 2p regions. (d) Al region. (e) O 1s regions.

### Supplementary Information 3

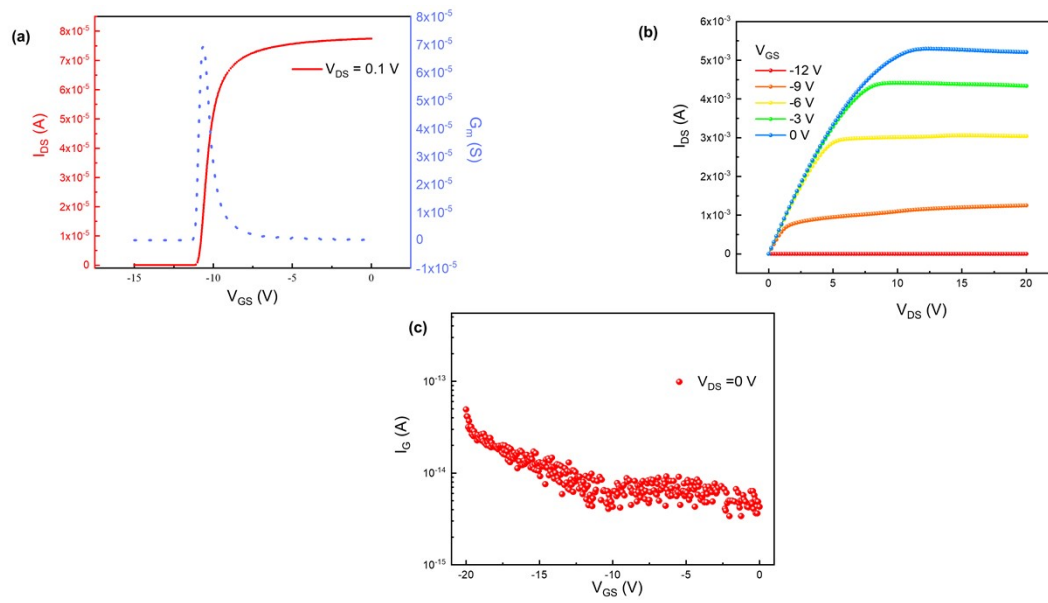

**Figure S3.** Basic I-V characteristics of GaN optoelectronic memory. (a) The transfer characteristics. (b) The output characteristics. (c) The ultra-low gate leakage current.

**Supplementary Information 4**

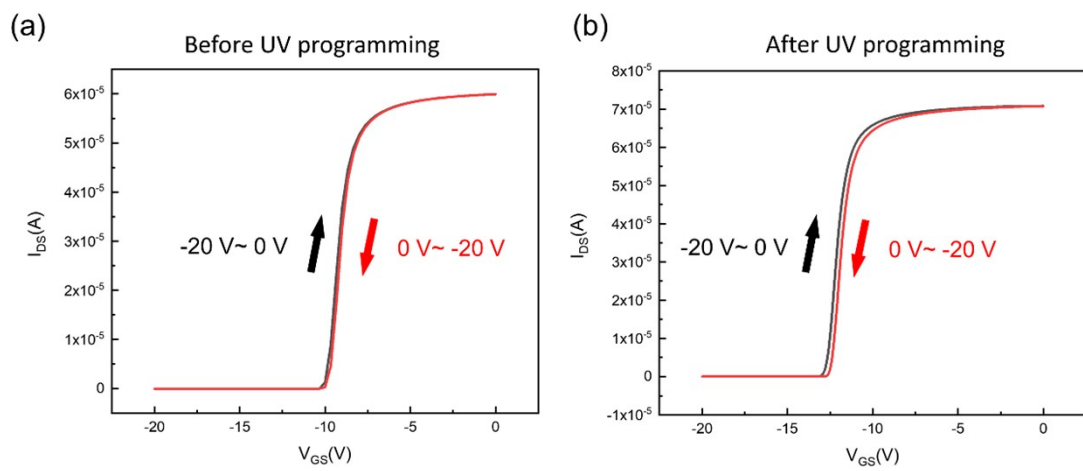

**Figure S4.** (a) Hysteretic behavior before UV programming (b) Hysteretic behavior with respect to the incident UV powers.

### Supplementary Information 5

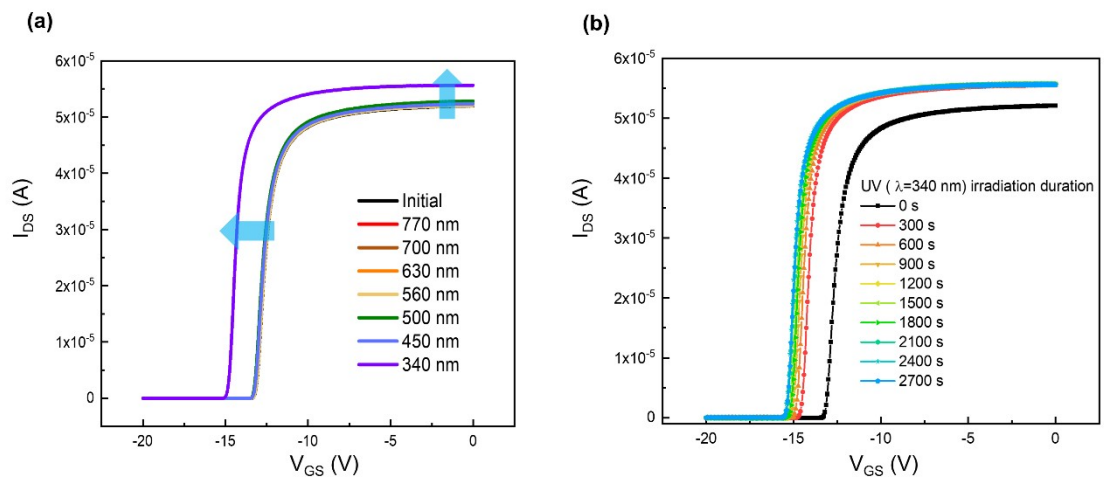

**Figure S5.** (a) GaN optoelectronic memory's response to light exposure at various wavelengths. (b) Effects of UV irradiation duration on the programming speed and memory state.

**Supplementary Information 6**

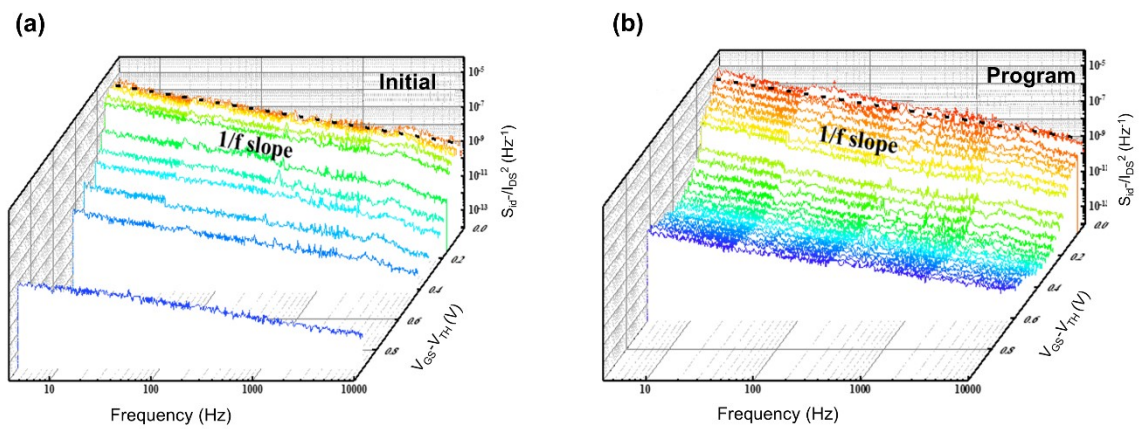

**Figure S6.** *1/f* noise characteristics of GaN optoelectronic memory before and after UV programming. (a) Initial state. (b) Programmed with UV irradiation.

### Supplementary Information 7

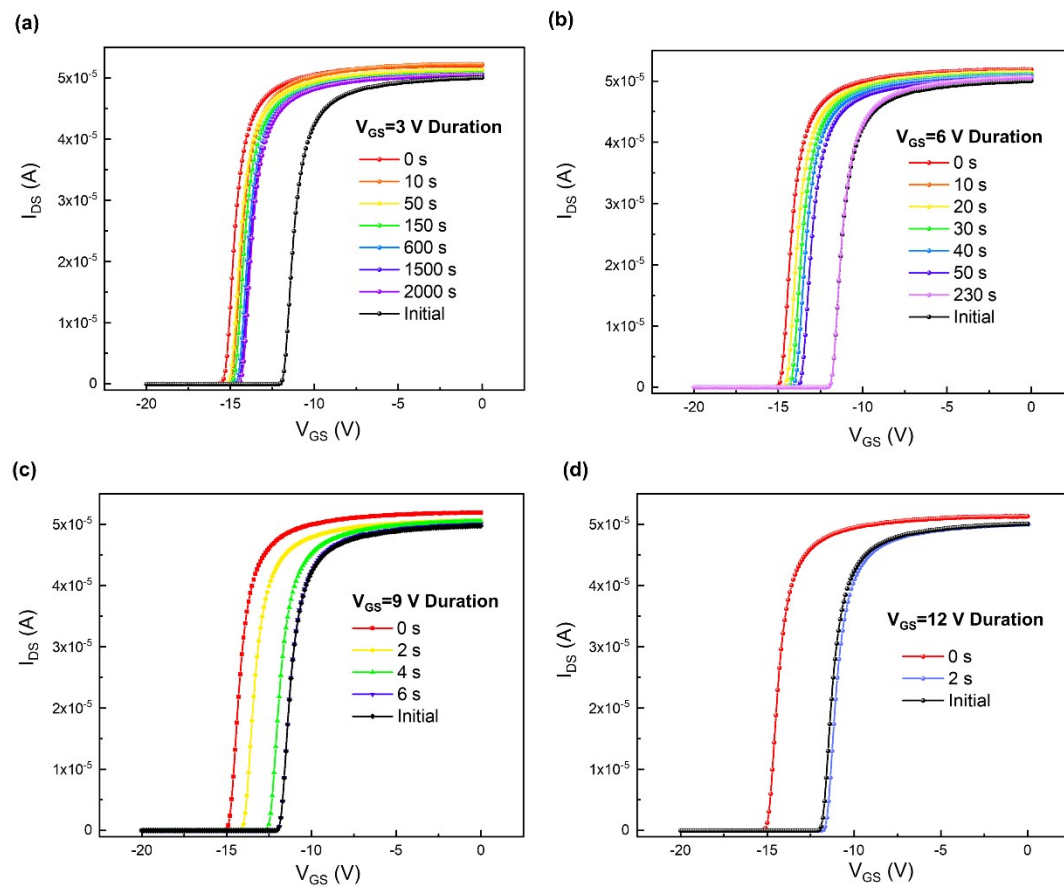

**Figure S7.** The influence of gate voltage on the erasure time of GaN optoelectronic memory. Erase the device under different positive gate pressures: (a) 3V; (b) 6V; (c) 9V; (d) 12V



### Supplementary Information 8

The biexponential fitting result of  $\Delta V_{TH}$  retention characteristics in **Figure S8 a** is

shown in formula (1):

$$\Delta V_{TH} = 1.061e^{\left(-\frac{t}{936.286}\right)} + 0.26e^{\left(-\frac{t}{13509.522}\right)} + 1.661 \quad \#(1)\#$$

The biexponential fitting result of  $\Delta I_{DS}$  retention characteristics in **Figure S8 b** is shown

in formula (2):

$$\Delta I_{DS} = 1.524 \times 10^{-6}e^{\left(-\frac{t}{1627.469}\right)} + 7.822 \times 10^{-7}e^{\left(-\frac{t}{20890.698}\right)} +$$

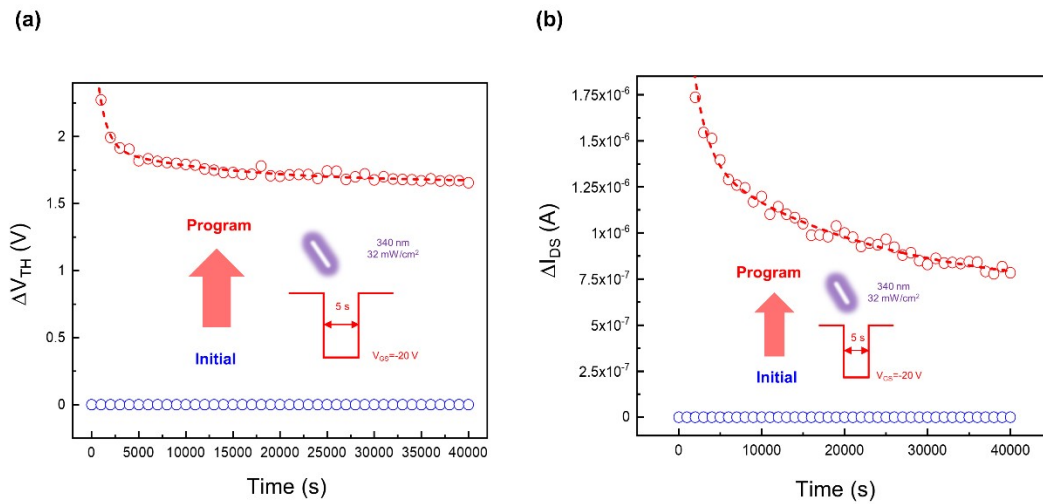

**Figure S8.** (a) Fitting result of the retention curves for  $\Delta V_{TH}$ . (b) Fitting result of the retention curves for  $\Delta I_{DS}$ .

***Supplementary Information 9***

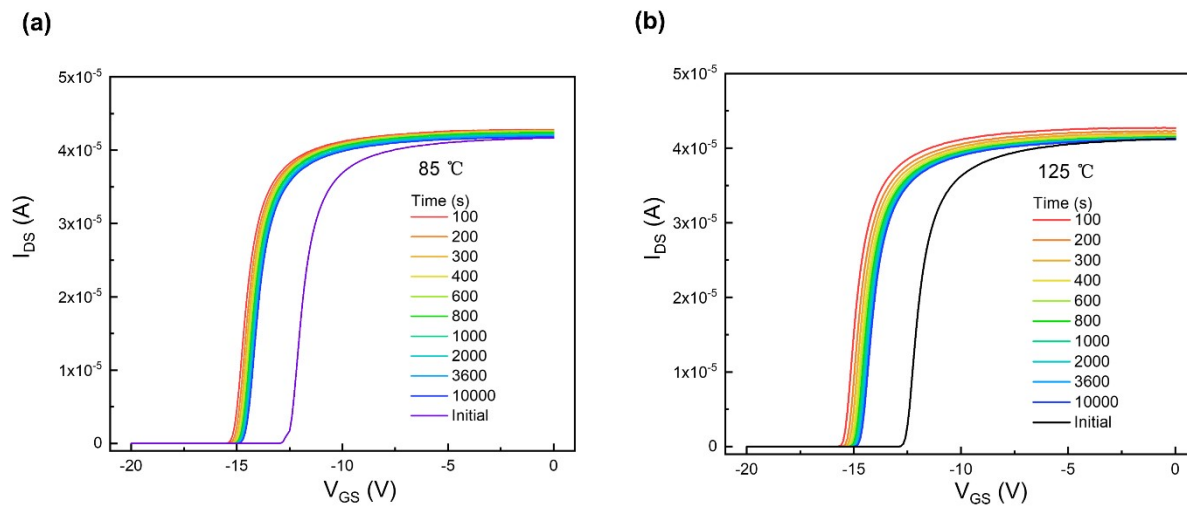

**Figure S9.** Retention characteristics of GaN optoelectronic memory at different temperatures: (a) 85 °C; (b) 125 °C.

### Supplementary Information 10

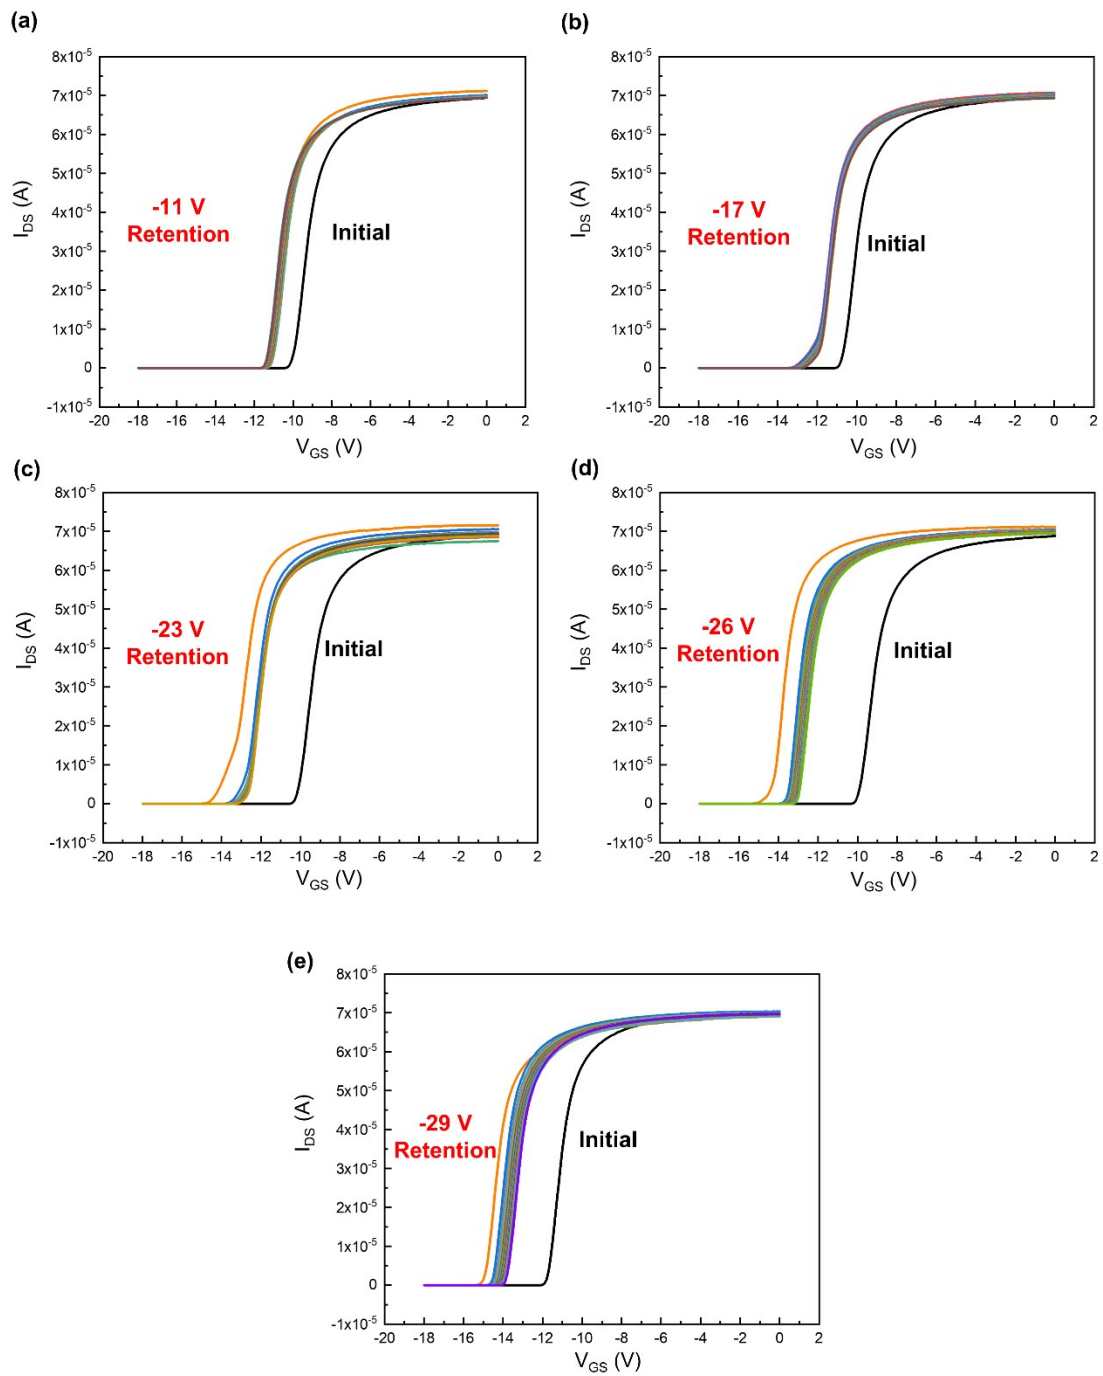

**Figure S10.** The retention characteristics of the transition curves for five storage states of the memory: (a) -11 V; (b) -17 V; (c) -23 V; (d) -26 V; (e) -29 V.
